# Supplementary material for: Stratospheric aerosol characteristics from SCIAMACHY limb observations: 2-parameter retrieval
Source: Copernicus journal article supplement (doi:10.5194/amt-2023-156), 2023-07-26
Supplement: Supplementary file [file amt-2023-156-AC3-supplement.pdf]

Dear Reviewer,  
we thank for your very valuable comments. We revised our paper in light of your comments (in black). The answers are shown below in red.  
Best wishes,  
Pohl et al.

## Overview

The authors present an improvement on a previous technique for inferring particle size distribution (PSD) parameters from the SCIAMACHY data record. The proposed technique performs a 2- parameter ( $r_g$  and  $\sigma_g$ ) retrieval that is not limited to the tropics (an improvement over Malilina et al. 2018). The authors evaluated the impact their assumptions have on the end products and compare their PSD values (including the calculated effective radius ( $r_e$ )) to those measured directly by the University of Wyoming optical particle counter (UWY OPC) as well as those inferred from the SAGE II and SAGE III/M3M instruments. Further, they used their derived PSD parameters to calculate extinction coefficients (they labeled this Ext, I refer to this as  $k$  herein) and compared these to extinction coefficients as measured by the SAGE instruments and OSIRIS.

Overall this is an interesting paper that the community will benefit from. Overall, it is well written and the major claims are more-or-less substantiated (details below) and I believe this should be published if the authors can satisfactorily address the more salient points below.

Finally, I want to congratulate Dr. Pohl and the coauthors for the high-quality work that went into preparing this manuscript.

## Major Remarks

The stated goal of this work is to extract PSD parameters (for the sake of brevity I include  $r_e$  under the PSD label as appropriate) from SCIAMACHY data. This can be best achieved through comparison with the UWY OPC record, but comparison with OPC data is very limited. Instead, the authors devote a substantial portion of the paper to comparing their PSD parameters to those derived from the SAGE missions. Ultimately, this results in an evaluation of the assumptions in each model, which is a distraction from the intended purpose of this work. Direct comparison with the OPC record removes at least half of these assumptions and gets to the heart of the matter. This comparison should be expanded.

We have expanded the comparison of the OPC data with the SCIAMACHY retrievals by separating that in volcanically unperturbed and perturbed situations – please see answer of your comment below for further information (page 7).

An alternative to direct comparison with OPC data is using the SCIAMACHY-derived PSD parameters to calculate extinction coefficient. While the authors did this the evaluation was presented in a bulk-statistics manner (Figures 5 & 8) and it would have been much more informative to expand these figures to include more meaningful information (please see specific comments below). Further, this type of comparison removes the assumptions that went into the SAGE estimates and thereby provides a more robust and meaningful comparison.

We have expanded the comparison of Ext products by additionally showing the

monthly zonal means of the differences depending on the time, latitude, and altitude. The new Figures are Figure 6 and Figure 9 in the revised manuscript. The text has been adapted accordingly (starting from line 577) and also addresses the comparison of Ext products in the post-eruption periods. Analogously, we have also introduced a Figure 9 showing a similar setup for comparing the effective radii.

Another alternative is to use the SCIAMACHY-derived PSD parameters to calculate backscatter coefficients and compare those directly to the numerous ground-based lidars as well as CALIOP. This seems like a grossly overlooked opportunity (a potential gold mine of data) that would have significantly increased the number of intercomparison opportunities as well as the geographic coverage. If this should not be done then can the authors at least address, in the paper, why this should not be done?

A comparison with CALIOP would indeed be very interesting, but does not necessarily add a further value to this already long paper that already contains comparisons with five other reference data sets. We will do this comparison for an upcoming paper investigating the aerosol characteristics after volcanic eruptions. Additionally during much of the SCIAMACHY time period stratospheric aerosol were primarily close to a background state. At these low aerosol loadings, backscatter instruments struggle to tease the signal out of the noise. Vernier et al., 2009 had to do a lot of averaging to obtain scattering ratios characteristic of a clean stratosphere.

Vernier, J. P., Pommereau, J. P., Garnier, A., Pelon, J., Larsen, N., Nielsen, J., Christensen, T., Cairo, F., Thomason, L. W., Leblanc, T., and McDermid, I. S.: The tropical stratospheric aerosol layer from CALIPSO lidar observations, *J. Geophys. Res.*, 114, D00H10, doi:10.1029/2009JD011946, 2009.

There are numerous ambiguities throughout the paper that must be addressed before publication. Without correction the reader cannot understand the presented work and cannot reproduce it.

Finally, the current version of this manuscript suffers from a substantial flaw that prevents the reader from understanding and appreciating the impact and applicability of this work. The authors state that the intent of this method is to infer  $r_g$  and  $\sigma_g$  from SCIAMACHY data, but limit their discussion of these parameters. Instead, the authors spend more time discussing the comparison to SAGE-derived PSD parameters that are strongly dependent on the assumptions that go into the SAGE algorithm.

We have changed the priority of the comparisons according to your comment, please see the answer to your comment below for further information (page 11).

Further, the reader is not afforded the opportunity to see the overall performance of the SCIAMACHY-derived PSD estimates. Indeed, inclusion of PSD time-series plots (whether line plots with error bars or contour/mesh plots) would communicate a wealth of information to the reader not only on how the PSD parameters changed over the lifetime of the instrument (including volcanic impacts), but would also inform the reader of the stability of this retrieval algorithm. Such a figure would no longer limit the authors to coinciding with other instruments and would allow the authors to display the entire SCIAMACHY PSD record (all within a single figure!).

We have included a Figure (Fig. 3) containing all retrieved and calculated aerosol characteristics from SCIAMACHY period 2002-2012 at an altitude of 18.4 km.

In my view this paper cannot be published without this type of information content. To publish without this information leaves the reader

with a knowledge gap that should not be there. Why is this so important? Because this informs the reader and end-user of how stable and reliable these estimates are. I agree that, in aggregate, comparison with SAGE/OSIRIS is generally good, but there are many unanswered questions. Does the PSD algorithm become unstable at certain altitudes? Does it perform better seasonally?

This will be answered by a new Fig. 1. See answers to your comments below (page 5).

How much do volcanic perturbations influence the PSD estimates? What about wildfires events? Without answering these questions I cannot ascertain the utility of these estimates.

According to the new Figs. 4 (comparison of OPC and SCIAMACHY using profiles of a volcanically unperturbed and perturbed situation) 6, and 9 (time dependent comparisons of Ext and reff from SCIAMACHY, OSIRIS, and SAGE series data), an influence of volcanic eruptions on the SCIAMACHY-obtained aerosol characteristics is now being investigated.

Additionally, volcanic events will be subject of an upcoming paper. We implement an indication in Sect. 8.3:

„Investigating the quality of the retrieved extinction coefficient and effective radius after volcanic eruptions or biomass burning events is appropriate and will be the subject of a subsequent publication.“

This is a potentially fantastic paper, but in its current state it is incomplete. For these reasons I recommend that the paper undergo major revisions and be resubmitted for review.

## Specific Remarks

- page 2, line 44: “catalysers” should be “catalysts”?

Changed.

- Section 4: There is a lot of repetition within this section. It reads as if it was written twice and never cleaned up. Please consolidate the information and rewrite to be concise and precise.

We apologize that the section seemed to contain repetitions and present a new structure.

- page 7, line 209: Why a relative humidity of 0%? Does your algorithm have some dependence in RH? This seems important since an RH of 0% is never true.

A relative humidity of 0% is of course never true but a relative humidity in the stratosphere can be and is often  $\ll 1\%$ , effectively 0. To address this comment, we have added the following text:

„Both, the aerosol composition and the relative humidity, are idealistic assumptions. The percentage of sulphuric acid can vary slightly in reality (Turco et al., 1982, Steele et al., 2003, Doeringer et al., 2012) and the stratospheric relative humidity is usually between 0 ( $\ll 1\%$ ) and 10 % (Steele et al., 1981). However, we stick to this convention because the OPAC database does not offer more realistic compositions. The resulting retrieval uncertainty was estimated by comparing retrieved PSD parameters assuming a relative humidity of 0 % and 80 %. The latter value is exceedingly high, but allows a maximum uncertainty estimate. It is below 15 % for the mode radius and below 10 % for the geometric standard deviation (not shown). Note that these values can also be

regarded as an uncertainty estimate due to an incorrect aerosol composition: By increasing the relative humidity, the particles absorb water vapour, which reduces the percentage of sulphuric acid. As a result, the aerosol refractive index (Palmer and Williams, 1975) changes with a similar amplitude to that of an increase in relative humidity (Hess et al., 1998).“

- page 7, line 212: Please define  $R_{\text{mod}}$ .  
The definition of  $R_{\text{mod}}$  was in the annex and has been moved to Section 2 (Stratospheric aerosol characteristics).
- page 7, line 212: You stated that  $R_{\text{mod}}$  and  $\sigma_g$  are arbitrarily chosen, but why these specific numbers ( $\sigma_g$  of 1.37 is a precise number, why not 1.4)?  
We corrected respective sentence:  
„Both values are based on balloon-borne measurements at background aerosol loadings (Deshler, 2008).“
- page 8, line 220: What is meant by “Above 35 km, the PSD profile remains unchanged.”? Please provide a reference to support this claim.  
To address this comment, we have added the following text:  
„Above 35 km, a vertically constant PSD profile is assumed with  $R_{\text{mod}}=0.11 \mu\text{m}$  and  $\sigma_g=1.37$ . ... The aerosol parameterizations outside the altitude range of 18 - 35 km might be inadequate. However, they avoid unphysical aerosol size parameters in the lowermost (18 km) and uppermost retrieval height (35 km). Additionally, they have only a minor influence on the aerosol size parameters to be retrieved in between (Malinina et al., 2018).“
- page 8, lines 220–222: You use both  $r_g$  and  $R_{\text{mod}}$  in this sentence. I understand the difference between the 2, but it seems you use them interchangeably here. Please clarify.  
To address this comment, we have added the following text:  
„A vertically constant aerosol size is used as an initial condition. The mode radius is set to  $R_{\text{mod}}=0.11\mu\text{m}$ . Note the convention used here - the retrieval is controlled externally by  $R_{\text{mod}}$  and not by  $r_g$ . The geometric standard deviation is set to  $\sigma_g=1.37$ .“
- page 8, lines 220–224: Herein you stated that  $r_g$  has a lower-limit of 0.05  $\mu\text{m}$  and  $\sigma_g$  is not limited. Surely  $r_g$  has an upper limit as well as a lower limit. Surely  $\sigma_g$  was also limited. Not to be pedantic, but  $\sigma_g$  cannot be less than 1...could it, in theory, be  $>5$ ? Could  $r_g$  be 10 $\mu\text{m}$ ? These values must be fundamentally limited by your model, please provide those limits here.  
Here we discuss mathematical rather than physical limits. This means, that the inversion algorithm is not allowed to produce  $R_{\text{mod}}$  values less than 0.05 $\mu\text{m}$ . There are no maximum limits for  $\sigma_g$  and  $r_g$  as such limitations are mathematically useless. In contrast to the minimum  $r_g$  limit, the other limits do not help to keep the inversion stable when they are reached.
- page 8, line 225: Here you state that “step 2” solves for 3 parameters ( $r_g$ ,  $\sigma_g$ , and albedo). Section 2 stated that “step 2” only solves for  $r_g$  and  $\sigma_g$ . Please clarify.  
At the beginning of section 4, we include an additional sentence to describe more thoroughly the second retrieval step:  
„Retrieval errors in the aerosol parameters that may arise from the assumption of a Lambertian surface are mitigated by an adjustment of the surface albedo in the second retrieval step.“

- page 9, line 255: Please confirm that the 0.15 and 10.0  $\mu\text{m}$  values are radii and not diameters (newer OPC instruments have a lower limit diameter of  $\approx 150$  nm).

We have changed the respective sentence:

„The instrument itself is only sensitive to particles with radii between 0.15 and 10.0  $\mu\text{m}$ .“

- page 10, lines 301–302: This is not correct. The grating spectrometer did not include the 1550 nm channel. The 1550 nm channel was an InGaAs photodiode. Please clarify for the reader.

Corrected:

„The solar irradiance was measured by a grating spectrometer at 86 wavelengths from 280 to 1040 nm with a spectral resolution of 1 to 2 nm. An Indium Gallium Arsenide photodiode additionally measured the irradiance at 1550 nm with a bandwidth of 30 nm.“

- page 12, line 356: “Their PSD profiles are specified below.” I assume this refers to Table 1. Please include reference to appropriate table or figure.

To address this comment, we have added the following text:

„Their PSD profiles are specified below (Tab. 1 for testing the sensitivity to the Lambertian surface assumption, Fig. 2 black lines for testing the sensitivity to the aerosol number density).“

- Figure 1: I am not colorblind, but I still have a very difficult time reading this figure. This is one of the key figures of your paper. Please update to make it more readable.

Done.

- page 13, line 375: “...with latitudes north of 26°N in summer and 23°S in winter.” It is unclear what this means. Do you never go farther south than 23°S? Please clarify.

We completely revised Sect. 6.1 to make this statement clearer.

- Sections 6.1 and 6.2: This is a critical aspect of this paper. Ultimately you do not know the PSD parameters so you cannot definitively calculate the error in your derived PSD parameters that is caused by the Lambertian assumption and the assumed N profile. Therefore, how do you propagate the error from these 2 assumptions into your estimates for  $r_g$ ,  $\sigma_g$ , and extinction coefficient (e.g., in Fig. 4)? Is this uncertainty ignored for the rest of the paper, or is it accounted for?

We give a summary at the end of Section 6.2:

„To summarise Sect. 6, the PSD parameters  $r_g$  and  $s_g$  can be accurately retrieved up to a single-scattering angle of about 96°. This corresponds to latitudes north of 26°N in summer and 23°S in winter. Beyond this threshold, limb radiances are less sensitive to aerosols making it difficult to retrieve the PSD parameters separately. They can be subject to large uncertainties and should therefore be treated with caution. In contrast, the accuracy of  $r_{\text{eff}}$  and Ext depends only slightly on the single-scattering angle. The two aerosol characteristics have reasonable results for both hemispheres.

The PSD retrieval is sensitive to the assumption of a Lambertian surface and the a priori number density profile. The latter effect exceeds the former one. However, the effect of the Lambertian surface assumption can only be calculated for ideal cases, i.e. homogeneous surface types. Moreover, the spatio-temporal distribution of the stratospheric aerosol number density is essentially unknown in reality. The SCIAMACHY retrieval has to rely on assumptions here that lead to errors in the

retrieved and calculated aerosol characteristics. A quantitative error estimation of both assumptions, the Lambertian surface and the a priori N profile, is therefore not possible for real retrievals. We can only point to these sources of uncertainty."

- page 14, lines 403-404: Here you state that you averaged over all angles from 20°- 96°. If I understood Section 4 correctly the variation in scattering angle has no impact on this process. If that is correct then please ignore this comment. If there is a dependence then would you please clarify here.

To address this comment, we have added the following sentences:

„According to [the new] Sect. 6.1, a separate retrieval of  $r_g$  and  $s_g$  at single-scattering angles larger than 96° is challenging due to a reduced sensitivity of limb radiances to PSD parameters. Therefore, they are not included in Fig. 2. The lower angular limit is based on instabilities that occurred during the retrieval at smaller single-scattering angles.“

- Figures 2 & 4: Do I understand this correctly that there is no variability in the inferred number density? You should be able to infer N as well (I thought that's what you did in Figure 7), so I expect some spread in the profiles. Please clarify.

N is not retrieved. The spread in Fig. 8 originates from the reference product:

„The differences in N show a broad distribution (Fig. 8 (e,f)). This is due to the variability of the retrieved N from SAGE III since the N profile from SCIAMACHY is invariant. According to the distribution width, a fixed N profile from SCIAMACHY seems to be questionable, because in some cases, it can be more than twice as large or small than the retrieved N profile from SAGE III. As a result, the differences of  $r_g$  (Fig. 8 (a,b)) and  $\sigma_g$  (Fig. 8 (c,d)) also show a significant spread, albeit less than in N.“

- page 15, line 413: "...correct selection of the a priori N is crucial..." That's not how I interpret Figure 2. It looks like the algorithm is sensitive to the N profile and how close it is to reality. However, "crucial" may be an overstatement. The  $r_g$  is mostly within +/-25% up to  $\approx 30$  km. The  $r_e$  is even better. I think the text, as written, misleads the reader. Please revise.

To address this comment, we have added the following text:

„To conclude, the retrieved ( $r_g$ ,  $s_g$ ) and calculated aerosol characteristics ( $r_{eff}$ , Ext) depend on the assumption of the a priori N profile. The more correct this assumption is, the more precisely the aerosol characteristics can be retrieved.“

- page 15, line 418: "...latitudes south of 26°N in summer and 23°S in winter." Please see similar comment above.

See answers above.

- Figure 3: Please consider plotting panel (a) on a log scale. Maybe not necessary, but it helps readability. If the authors disagree then please disregard this comment.

Done.

- page 16, line 424: "2002 and 2011" Why not "2002 and 2012"?

This was a mistake. The data set has been extended to 2012.

- page 16, line 426: "...these processes are evidenced in Fig. 3." This level of information cannot be ascertained from a simple extinction coefficient plot. Please revise.

To address this comment, we have added the following text:

„Figure 3 shows the results at 18.4 km altitude. The changes in aerosol characteristics after volcanic eruptions are particularly striking. The injected masses usually increase  $r_g$ ,  $r_{eff}$ , and Ext, and reduce  $s_g$ . Their temporal developments are determined spatially by advection and microphysically by nucleation, coagulation, condensation, and sedimentation.“

- Figure 4: How were the relative error statistics calculated? Did you first calculate the relative errors then average, or did you calculate the average  $r_g$  then the relative error?

To address this comment, we have added the following text:

„Relative errors are calculated as  $(SCIAMACHY - \text{balloon}) / \text{balloon} \times 100\%$  before averaging.“

- Figure 4: This is possibly the most important figure in this paper (comparing to OPC) and should receive more attention. You put all of the data into one plot (I realize the OPC data are sparse), but this leaves me wondering if information is lost in the bulk statistics. Did volcanic activity significantly change the performance of your method? Breaking this analysis into 2 paradigms (volcanically perturbed/not-perturbed) would be illuminating. Without this information it is difficult to realize the value of this method.

We thank you for the valuable comment. Splitting [old] Fig. 4 in perturbed & non-perturbed profiles is a good idea. However, it is difficult to realize for the following reasons:

(1) Out of 23 profiles, only 4 contain volcanic plumes. Two of those are measured at volcanic plume edges and are not strongly influenced by volcanic aerosols. A statistical analysis of the volcanically perturbed profiles for such a small set of data is not very meaningful.

(2) We have noted that the small number of volcanically perturbed OPC profiles are not sufficient for a meaningful statistical analysis. This is especially the case when the balloon OPC recorded aerosols are at the cloud edge. Consequently, the comparison with the collocated SCIAMACHY profile should be treated carefully due to a) spatio-temporal mismatch (<12 hours, <750 km) b) the different measurement footprints of the instruments. These issues have to be taken into account.

That is why we decide to show only a small comparison. We have included an additional Figure in the revised manuscript (new Fig. 4), which shows the comparison of two balloon-profiles with SCIAMACHY retrievals. One profile was measured during aerosol background condition (7 May 2005), one profile was measured after the Sarychev eruption (7 Nov 2009). The text in lines 495 – 531 explains the differences between the volcanically perturbed and unperturbed profiles.

A much more detailed analysis about the behaviour of SCIAMACHY retrievals in post-volcanic eruption periods is in progress and is the subject of a planned subsequent paper.

- page 17, lines 441–442: “...and one based on balloon-borne measurements over Wyoming before 2002...” This is confusing. This sounds like you use an OPC-based climatology as your N profile, which has the potential to significantly bias your evaluation. This raises several critical questions regarding the methodology.

1. Are you now using an OPC-based climatology for your N profile? If so, did you also use this climatological profile in creating Figure 2?

Yes, this is now explicitly stated.

2. You stated this N profile is based on WY OPC data collected before 2002. Does this include data collected throughout the entire record (i.e., back to 1971)? If so, how do you handle the differing OPC instruments? How do you handle extreme outlier events like El Chichon and Pinatubo? How did these events influence the overall performance of your algorithm?

We explicitly stated the length of the time series:

„... based on balloon-borne measurements over Wyoming between 1989 and 2001.“

The large eruption of Mount Pinatubo is within this period. We averaged all profiles within the time frame, thus the impact of Mount Pinatubo is limited. In addition, some outliers in the averaged profile were manually filtered to get a smoothed profile. The main goal of this approach was to create an aerosol profile which might be representative of reality. To avoid correlations between the created number density profile and the profiles to be retrieved, we took the precaution of omitting the period 2002- 2012 when creating the profile.

3. From Figure 4, it looks like the OPC-based N profile yields better performance than the ECSTRA profile (better errors, the profile shape is in better agreement with reality, etc.), yet you never state which N profile you use in the operational algorithm. I assumed you use the ECSTRA profile, but Figure 4 indicates the OPC profile is better. Please clarify.

In Sect. 4, it is now stated at the beginning:

„... the number density profile is based on the ECSTRA model climatology for aerosol background conditions (Fussen and Bingen, 1999).“

- page 18, lines 448–449: “...which can be explained by a small reference value (Fig. 4 (i)).” Did you mean Fig. 4 (d)? Also, I’m not sure Figure 4 supports this claim. Extinction coefficients on the order of  $1E-4$  (i.e.,  $z \leq 24$  km) are not small. What you are dealing with here is, in fact, relatively large differences in the derived extinction coefficients.

We have added the following sentences:

„Relative errors in Ext can exceed 100 % (Fig. 5(i)). This large value is a result of the calculation method which is not robust against outliers. The median of the relative errors is below 20 %. Further, the relative errors in Ext depend only slightly on the choice of the a priori N profile.“

- Figure 5: You allude to this figure throughout the text and reference statistics from this figure. However, I cannot read this figure. There are so many colors on top of each other I cannot tell where they all begin/end...and I cannot tell if the quoted numbers quote are correct (I assume they are, I just cannot verify). Please improve the readability of this figure.

Done. Instead of using shading areas, we use error bars. Those are slightly shifted vertically for better readability.

- Figure 5: Why the stark difference between this figure and Figure 4 (i)? There is no stark difference. In [new] Fig.5, the relative error is calculated with respect to the OPC. In [new] Fig. 7, the relative difference of two



observations is given with respect to the average of the two observations. The reason is given in the next comment.

- Figure 5: Why not use the same method to calculate error as used in Figure 4?

To address this comment, we have added the following sentences:

„Note that in contrast to Figs. 2 and 5 the calculation of the difference is changed here and in the following figures. This is because we do not know which satellite data product is correct. We therefore now refer to deviations between the products, instead of calculating errors by using one satellite data product as the 'true' reference.“

- page 19, lines 489–490 “...with the differences decreasing with altitude.” This is not what Figure 6 shows. All differences increased (except panels f and g). Please clarify.

The referee is referring to the new Fig. 10, where indeed all the differences become smaller with altitude between 40°S and 40°N. We have corrected the sentences:

„The effective radii from SCIAMACHY are systematically lower than those from SAGE II and SAGE III. At 31.5 km altitude,  $r_{\text{eff}}$  from SAGE II and SCIAMACHY agree well with differences below 17.7 % at latitudes from 40°N to 40°S and below 43 % at higher latitudes (Fig. 10). Best agreement is achieved in the tropics. The differences becoming larger with decreasing altitude south of 40 °N due to a faster increase of  $r_{\text{eff}}$  from SAGE II compared to SCIAMACHY. The reason is still unknown. The altitude dependency is most pronounced in the tropics. Here, the differences can increase up to 45.6 % (v7.0 NASA) and 57.0 % (DWE). The differences at 18.4 km seem to be independent of the volcanic perturbation (Fig. 9).“

- Figure 6: This figure exemplifies why the comparison with OPC (or even a comparison of  $k$ ) is of more value than comparing with the SAGE-derived PSD parameters. The extreme slope in panels b–e indicates a systematic error in the SAGE PSD values. How is the reader to draw meaning from this analysis? Can the authors account for this extreme slope?....

Please see comment above.

....To be honest, the extinction comparison looked promising, so I was somewhat shocked to see this odd behavior in these profiles (I do note that the authors plotted here data from both SAGE missions and that this is a figure for  $r_e$  (a derived product that is based on derived products, which adds another layer of obfuscation)). Given the ambiguities, it is unclear how this figure is helpful, especially since the intended purpose of this work is to extract  $r_g$  and  $\sigma_g$  from SCIAMACHY...not  $r_e$ .

While the intended first purpose of this work is to derive  $r_g$  and  $\sigma_g$  from the SCIAMACHY data a secondary purpose is to then use those quantities to derive useful geophysical parameters such as  $r_{\text{eff}}$ , and then it is natural to compare such results with other derivations of similar quantities. This figure is just to illustrate such comparisons and their differences.

To address this comment, we have added the following text:

„Best agreement is achieved between SCIAMACHY and SAGE III with deviations of 1.3 to 17.9 %. This is remarkable when one considers the large differences in the PSD parameters (Fig. 8). This is the advantage of comparing  $r_{\text{eff}}$ . Firstly, its calculation is independent of  $N$  according to Eq. (4). Secondly, the anti-correlation of  $r_g$  and  $\sigma_g$  compensates the

uncertainties in reff.“

- page 20, line 501: “...utilizes a fixed number density profile...” What is this profile? Is it the OPC-based climatological profile, or the ECSTRA profile?

To address this comment, we have added the following sentence:

„The former utilizes a fixed number density profile based on the ECSTRA model climatology.“

- page 20, line 509: “...can be by up to 51.1%.” I have 2 points. First, should this be “...can be up to 51.1%”? Second, the error in N (including error bars) goes well beyond 51% (maybe even over 100%). Please clarify.

We incorporate the word „mean“:

„The mean deviation in the a priori N can be up to 51.1 %.“

- Section 7.3 and Figure 8: It is unclear how the 1989–2002 time period is relevant to this study. This seems like wasted space and text. Figure 8 would be much more meaningful to the reader if the authors were to remove the 1989–2002 period (this would also allow them to use consistent scales) and create a single time series (i.e., 2002–2012). The figure could be further improved by breaking it into 2 figures (1 for extinction, 1 for  $r_e$ ), with each figure containing sub-plots for different altitudes (e.g., panel (a) could be 30 km, panel (b) is 25 km, etc.). The value of doing this is it shows the reader the relevant information and provides the reader a much better understanding of the performance of this algorithm at multiple altitudes. Finally, showing this as a time series (instead of the aggregate profile statistics) allows the reader to appreciate the influence volcanic perturbations have on this method.

Done. We revised Sect. 7.3 – which is now chapter 7.4.

- Figure 8: It seems the first legend (titled “Symbols: Comparison of”) is unnecessary. There is no “comparison” plotted in these panels, so it is unclear what the legend title means. The 2 legends could be consolidated to make the figure more easily interpreted.

Done.

- page 23, lines 532–533: “...due an increasing median radius with a simultaneously decreasing geometric standard deviation.” First, should this be “...due to an...”? Second, this claim is conjecture and is not supported by the analysis. Since you are dealing with inferred values at this point I suspect that everything you see here, including the changes in  $r_g$  and  $\sigma_g$ , are symptoms as opposed to the root cause. Can the authors provide additional support for this claim or reword this sentence?

We revised the sentences:

„A slight but significant upward trend in the effective radius from SAGE III can be observed especially at the altitude of 21.7 km. This comes along with an increasing median radius and a decreasing geometric standard deviation (not shown).“

- page 23, line 535: What is the constant in the SCIAMACHY process? Undoubtedly it is N, but which N (UWY OPC or ECSTRA) is it?

To address this comment, we have added the following text:

„A possible reason might be that in all three retrieval algorithms one of the PSD parameters is assumed to be constant, namely  $N_{ECSTRA}$  in the SCIAMACHY retrieval, the total N of  $20 \text{ 1/cm}^3$  in the v7.0 NASA retrieval, and  $s_g=1.5$  in the DWE approach.“

- Figure 9: Again, this figure is an excellent example of why the authors

should make the comparison with the UWY OPC products their first priority and give this analysis the most weight. This is also why the second priority should be comparing SCIAMACHY-derived extinction coefficients with SAGE/OSIRIS extinction coefficients should receive more weight and be second priority. This figure clearly demonstrates that the comparison is dominated by the assumptions in the SAGE estimates.

We have changed the priority of the comparisons according to your comment:

→ Sect. 7.1 Comparison with balloon-borne measurements changes according to the comments above.

→ Sect. 7.2 Comparison of satellite retrieved aerosol extinction coefficients

We include the following text at the beginning:

„Comparisons of satellite data products include data from a large spatial and temporal range. However, they have a decisive disadvantage compared to the comparisons with balloon-borne OPC measurements in Sect. 7.1: Similar to the SCIAMACHY v2.0 aerosol product, the reference satellite data sets cannot be measured directly, but are retrieved from the satellite-measured radiances. Those retrievals are themselves subject to uncertainties, which creates an additional layer of ambiguity. A difference between two satellite retrieved aerosol products does not allow any conclusions to be drawn as to which product is the more accurate. In order to limit ambiguity, this section is restricted to the comparison of aerosol extinction coefficients. Here, most of the reference data sets are retrieved directly (Sect. 5). Section 7.3 then deals with the comparison of aerosol sizes. In this case, the reference data sets are obtained from aerosol extinction coefficients, i. e., they are secondarily retrieved data products, which add another layer of ambiguity.“

→ Sect. 7.3 Comparison of satellite retrieved aerosol size parameters

We include the following text at the beginning:

„We now focus on the comparison of satellite retrieved aerosol size parameters, i. e., the PSD parameters and the effective radius. As already mentioned, this comparison uses secondarily retrieved size parameters as reference data sets. They are subject to uncertainties caused by two retrievals, firstly, that of Ext and, secondly, that of the PSD parameters or reff from Ext. Thus, differences between the aerosol size parameters from SCIAMACHY v2.0 and those from the reference data products may be larger than the differences in the aerosol extinction coefficients.“

→ Sect. 7.4 Temporal comparison

We include the following text at the beginning:

„We now focus on the temporal evolution of the aerosol extinction coefficient and effective radius. This is shown in Fig. 11...“

→ Concerning Fig. 12:

We include the following text:

„To conclude, Fig. 12 clearly demonstrates that the comparison of the effective radii is dominated by the a priori retrieval assumptions. Those may slightly distort the retrieval data.“

- page 27, lines 648-652: I have several points about this text.
  1. I saw nothing in the paper to indicate that “the median radius and geometric standard deviation are fully reliable only in the northern hemisphere.” (emphasis mine). If this was in text then I sincerely apologize. Since the authors are limited to UWY OPC data (i.e., northern hemisphere) for validation I don’t know how you could determine this. Please clarify.
  2. If the southern hemisphere SCIAMACHY PSD parameters are “bad” then how do you justify inferring extinction coefficient and  $r_e$  from them? It would seem you are getting a more-or-less right answer for the wrong reasons. Please clarify.
  3. The previous 2 points seem to be contradictory. Please clarify in the text.
  4. The authors stated that the intent of this method is to derive PSD parameter ( $r_g$  and  $\sigma_g$ ) from SCIAMACHY data...and do so globally. If the southern hemisphere  $r_g$  and  $\sigma_g$  are, per the authors’ statement, unreliable then has the intent of this work failed? If so, the abstract must be updated to reflect the limited applicability of this method.  
To address this comment, we have added the following text:  
„The median radius and the geometric standard deviation are accurately retrieved for single-scattering angles smaller than  $96^\circ$ , i.e., at latitudes north of  $26^\circ\text{N}$  in summer and  $23^\circ\text{S}$  in winter (Fig. 1). At larger single-scattering angles, limb radiances are less sensitive to aerosols. That leads to increasing uncertainties in the retrieved PSD parameters which should be treated with caution. The extinction coefficient and the effective radius benefit from the anti-correlation of the uncertainties - while the median radius is underestimated, the geometric standard deviation is overestimated and vice versa. They can therefore be retrieved satisfactorily in both, the northern and southern hemispheres.“
- page 27, line 666: The “link” must be updated.  
Done.
- Appendix A: While this appendix is interesting, I fail to see how it makes a substantive contribution to the paper and should be removed (unless the authors can justify its inclusion, of course).  
It is deleted.
